# Supplementary material for: The effect of alkali treatment and organic modification of diatomite on the properties of diatomite composite separators
Source: Royal Society of Chemistry journal article supplement (doi:10.1039/d2nj04292d), 2022-01-01
Supplement: d2nj04292d1.pdf [file d2nj04292d1.pdf]

1

## Supporting Information

2

**Effect of alkali treatment and organic modification of**

3

**diatomite on the properties of diatomite composite separator**

4

Bing Xue<sup>a,b</sup>, Tianxing Yi<sup>a,b</sup>, Dongni Li<sup>a,b</sup>, Fangfei Li<sup>a,b</sup>, Feng Luo<sup>a,b,\*</sup>

5

6

<sup>a</sup> Key Laboratory of Automobile Materials of Ministry of Education, Changchun 130022, China

7

<sup>b</sup> Department of Materials Science and Engineering, Jilin University, Changchun 130022, China

8

**\*Corresponding: Feng Luo (luofeng@jlu.edu.cn)**

9

1 Fig. S1 displays XPS spectra of Si 2p on surface of raw diatomite and organic-  
2 modified diatomite (O-D). In the spectrum of raw diatomite, the peak of Si 2p was at  
3 103.3 eV, which was in agreement with Si 2p in SiO<sub>2</sub> (103.3 eV).<sup>1</sup> As hydroxyl was  
4 electron withdrawing group, the binding energy of Si 2p in Si-OH on the diatomite  
5 surface shifted to 104.1 eV. In the XPS spectrum of O-D, two peaks of Si 2p appeared  
6 at 103.5 and 104.2 eV, respectively. The higher intensity Si 2p peak at 103.5 eV was  
7 attributed to Si 2p in H<sub>2</sub>C=C(CH<sub>3</sub>)CO<sub>2</sub>(CH<sub>2</sub>)<sub>3</sub>-Si from the modifier MPS on O-D  
8 surface. The group H<sub>2</sub>C=C(CH<sub>3</sub>)CO<sub>2</sub>(CH<sub>2</sub>)<sub>3</sub>- was a electron withdrawing group and  
9 therefore the binding energy was slightly higher than SiO<sub>2</sub> (103.3 eV). As MPS  
10 reacted with Si-OH and the amount of -OH greatly decreased, the peak of Si-OH  
11 became weak.

12 The corresponding revision has been added to the revised manuscript and  
13 Supporting Information.

14

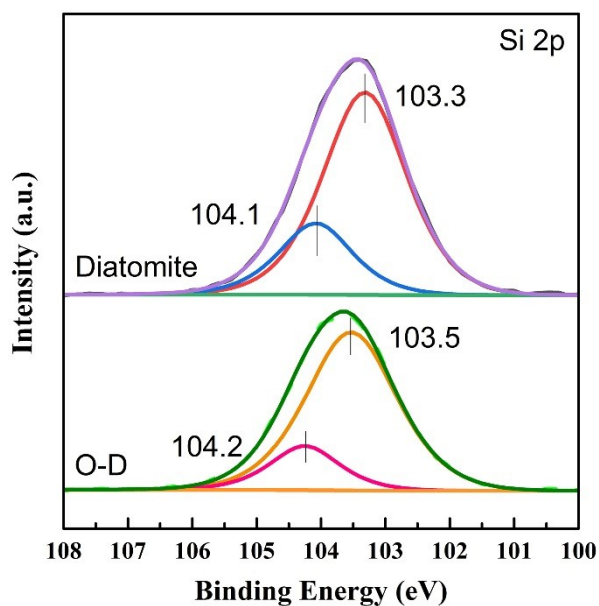

15

16

Fig. S1 XPS spectra of raw diatomite and O-D

17
